# Supplementary material
Source: MDPI journal article supplement (https://www.mdpi.com/1999-4907/15/2/392)
Supplement: s1 [file s1]

**Table S1.** Main characteristics of sample sites with different elevation gradients

| Forest Stand Type | Sample plot ID | Number of plot | Coordinates               | Altitude(m, a. s. l.) | Stand average tree height (m) | Stand average diameter at breast height (cm) | Dominant taxa                                                                                                                                                                                                                                                                                                                                                                                                                                            |
|-------------------|----------------|----------------|---------------------------|-----------------------|-------------------------------|----------------------------------------------|----------------------------------------------------------------------------------------------------------------------------------------------------------------------------------------------------------------------------------------------------------------------------------------------------------------------------------------------------------------------------------------------------------------------------------------------------------|
| Pure stands       | EleA1          | 2              | N37°51'17"<br>E111°32'41" | 1720                  | 21.7                          | 35.3                                         | <i>L. principis-rupprechtii</i> , <i>Rosa</i> sp., <i>Daphne giraldii</i> Nitsche, <i>Spiraea salicifolia</i> L., <i>Potentilla glabra</i> Lodd., <i>Fragaria orientalis</i> Losinsk., <i>Geranium wilfordii</i> Maxim., <i>nemone rivularis</i> Buch.-Ham. var. <i>flore-minore</i> Maxim.                                                                                                                                                              |
|                   | EleA2          | 3              | N37°52'34"<br>E111°33'15" | 1850                  | 19.1                          | 31.9                                         | <i>L. principis-rupprechtii</i> , <i>Picea asperata</i> Mast., <i>Betula platyphylla</i> , <i>Rosa</i> sp., <i>Berberis amurensis</i> Rupr., <i>Acer tataricum</i> subsp.ginnala, <i>Carex duriuscula</i> subsp. <i>Stenophylloides</i> , <i>Fragaria orientalis</i> Losinsk., <i>Chrysanthemum chanetii</i> , <i>Viola philippica</i> , <i>Anemone rivularis</i> Buch.-Ham. var. <i>flore-minore</i> Maxim.                                             |
|                   | EleA3          | 3              | N37°53'20"<br>E111°33'37" | 1950                  | 19.4                          | 32.5                                         | <i>L. principis-rupprechtii</i> , <i>Picea asperata</i> Mast., <i>Rosa</i> sp., <i>Spiraea salicifolia</i> L., <i>Lonicera japonica</i> Thunb., <i>Fragaria orientalis</i> Losinsk., <i>Carex duriuscula</i> subsp. <i>Stenophylloides</i> , <i>Chrysanthemum chanetii</i> , <i>Anemone rivularis</i> Buch.-Ham. var. <i>flore-minore</i> Maxim., <i>Taraxacum mongolicum</i> Hand. Mazz., <i>Veratrum nigrum</i> L., <i>Anemone vitifolia</i> Buch.Ham. |
|                   | EleA4          | 3              | N37°53'46"<br>E111°34'11" | 2050                  | 20.7                          | 30.5                                         | <i>L. principis-rupprechtii</i> , <i>Pinus tabulaeformis</i> , <i>Rosa</i> sp., <i>Ribes alpestre</i> var. <i>Giganteum</i> , <i>Acer tataricum</i> subsp.ginnala, <i>Rosa xanthina</i> Lindl, <i>Fragaria orientalis</i> Losinsk., <i>Carex duriuscula</i> subsp. <i>Stenophylloides</i> , <i>Ranunculus japonicus</i> Thunb.                                                                                                                           |
|                   | EleA5          | 5              | N37°54'25"<br>E111°35'01" | 2150                  | 22.2                          | 29.9                                         | <i>L. principis-rupprechtii</i> , <i>Picea asperata</i> Mast., <i>Rosa</i> sp., <i>Daphne giraldii</i> Nitsche, <i>Spiraea salicifolia</i> L., <i>Ribes alpestre</i> var. <i>Giganteum</i> , <i>Cotoneaster acutifolius</i> Turcz., <i>Fragaria orientalis</i> Losinsk., <i>Carex duriuscula</i> subsp. <i>Stenophylloides</i> , <i>Chrysanthemum chanetii</i> , <i>Lathyrus humilis</i> (Ser.) Spreng.                                                  |
|                   | EleA6          | 5              | N37°55'02"<br>E111°35'53" | 2250                  | 17.9                          | 25.7                                         | <i>L. principis-rupprechtii</i> , <i>Picea asperata</i> Mast., <i>Rosa</i> sp., <i>Ribes alpestre</i> var. <i>Giganteum</i> , <i>Daphne giraldii</i> Nitsche, <i>Fragaria orientalis</i> Losinsk., <i>Carex duriuscula</i> subsp. <i>Stenophylloides</i> , <i>Pedicularis resupinata</i> L.                                                                                                                                                              |

**Table S1.** Main characteristics of sample sites with different elevation gradients (continuation sheet)

| Forest Stand Type | Sample plot ID | Number of plot | Coordinates               | Altitude (m, a.s. l.) | Stand average tree height (m) | Stand average diameter at breast height (cm) | Dominant taxa                                                                                                                                                                                                                                                                                                                                                                                                                                                                                                                                                         |
|-------------------|----------------|----------------|---------------------------|-----------------------|-------------------------------|----------------------------------------------|-----------------------------------------------------------------------------------------------------------------------------------------------------------------------------------------------------------------------------------------------------------------------------------------------------------------------------------------------------------------------------------------------------------------------------------------------------------------------------------------------------------------------------------------------------------------------|
| Mixed stands      | EleB1          | 3              | N37°51'16"<br>E111°32'52" | 1720                  | 14.6                          | 22.5                                         | <i>L. principis-rupprechtii</i> , <i>Picea asperata</i> Mast., <i>Betula platyphylla</i> , <i>Rosa</i> sp., <i>Acer tataricum</i> subsp.ginnala, <i>Spiraea salicifolia</i> L., <i>Ribes alpestrevar.</i> <i>Giganteum</i> , <i>Fragaria orientalis</i> Losinsk., <i>Geranium wilfordii</i> Maxim., <i>Carex duriuscula</i> subsp. <i>Stenophylloides</i> , <i>Adenocaulon himalaicum</i> Edgew.                                                                                                                                                                      |
|                   | EleB2          | 3              | N37°52'30"<br>E111°33'31" | 1850                  | 14.6                          | 21.6                                         | <i>L. principis-rupprechtii</i> , <i>Picea asperata</i> Mast., <i>Betula platyphylla</i> , <i>Pinus tabulaeformis</i> , <i>Rosa</i> sp., <i>Ribes alpestrevar.</i> <i>Giganteum</i> , <i>Fragaria orientalis</i> Losinsk., <i>Lathyrus humilis</i> (Ser.) Spreng., <i>Plantago depressa</i> Willd., <i>Anemone rivularis</i> Buch.-Ham. var. <i>flore-minore</i> Maxim.                                                                                                                                                                                               |
|                   | EleB3          | 3              | N37°53'12"<br>E111°33'28" | 1950                  | 16.5                          | 25.8                                         | <i>L. principis-rupprechtii</i> , <i>Picea asperata</i> Mast., <i>Betula platyphylla</i> , <i>Betula albosinensis</i> Burk., <i>Pinus tabulaeformis</i> , <i>Spiraea salicifolia</i> L., <i>Rosa</i> sp., <i>Ribes alpestrevar.</i> <i>Giganteum</i> , <i>Potentilla glabra</i> Lodd., <i>Rosa xanthina</i> Lindl, <i>Carex duriuscula</i> subsp. <i>Stenophylloides</i> , <i>Stellera chamaejasme</i> Linn., <i>Taraxacum mongolicum</i> Hand. Mazz., <i>Astragalus membranaceus</i> (Fisch.) Bunge, <i>Chrysanthemum chanetii</i> , <i>Plantago depressa</i> Willd. |
|                   | EleB4          | 3              | N37°53'53"<br>E111°34'07" | 2050                  | 18.9                          | 30.5                                         | <i>L. principis-rupprechtii</i> , <i>Picea asperata</i> Mast., <i>Betula platyphylla</i> , <i>Rosa</i> sp., <i>Ribes alpestrevar.</i> <i>Giganteum</i> , <i>Fragaria orientalis</i> Losinsk., <i>Anemone rivularis</i> Buch.-Ham. var. <i>flore-minore</i> Maxim., <i>Taraxacum mongolicum</i> Hand. Mazz., <i>Ranunculus japonicus</i> Thunb.                                                                                                                                                                                                                        |
|                   | EleB5          | 1              | N37°54'35"<br>E111°34'48" | 2150                  | 20.5                          | 28.7                                         | <i>L. principis-rupprechtii</i> , <i>Betula platyphylla</i> , <i>Populus</i> L., <i>Spiraea salicifolia</i> L., <i>Rosa</i> sp., <i>Acer tataricum</i> subsp.ginnala, <i>Fragaria orientalis</i> Losinsk., <i>Geranium wilfordii</i> Maxim.                                                                                                                                                                                                                                                                                                                           |

**Table S2.** Variation of soil physicochemical factors under different altitudes and forest types in the 0-10 cm soil layer

|                 | Altitude | SW (%)      | ST(°C)      | SMaxW(g)     | SMinW (g)     | SP(%)        | BD(g/cm <sup>3</sup> ) | SOC(g/kg)     | SOM(g/kg)    | AN(mg/kg)       | TN(g/kg)   | AP(mg/kg)   | TP(g/kg)   | AK (mg/kg)     | INV (mg)    | URE (mg)       | PHO (mg)     |
|-----------------|----------|-------------|-------------|--------------|---------------|--------------|------------------------|---------------|--------------|-----------------|------------|-------------|------------|----------------|-------------|----------------|--------------|
| Pure<br>stands  | EleA1    | 10.75±2.91a | 19.34±1.02a | 34.59±3.92a  | 24.45±2.53ab  | 48.95±2.18a  | 1.42±0.07a             | 7.755±0.31a   | 11.12±0.56a  | 134.55±10.13abc | 1.9±0.05a  | 8.87±1.41a  | 0.38±0.01a | 219.59±19.61b  | 6.04±0.63c  | 211.67±13.05ab | 48.79±6.72b  |
|                 | EleA2    | 11.33±2.38a | 18.62±0.81a | 32.21±3.2a   | 25.47±2.06abc | 46.92±1.78ab | 1.49±0.06ab            | 8.71±0.53ab   | 15.02±0.45ab | 66.27±4.61a     | 1.08±0.07a | 8.33±0.92a  | 0.42±0.02a | 116.46±12.34a  | 2.64±0.32a  | 128.71±11.14a  | 31.23±4.51ab |
|                 | EleA3    | 18.08±2.38a | 18.37±0.62a | 34.73±3.2a   | 20.15±2.01a   | 49.23±1.23ab | 1.43±0.06abc           | 9.84±0.91abc  | 16.97±0.51ab | 131.13±14.62abc | 2.31±0.04a | 7.90±0.81a  | 0.69±0.05a | 125.17±10.14ab | 1.27±0.22a  | 118.79±10.89a  | 19.36±4.52a  |
|                 | EleA4    | 16.91±2.34a | 17.35±0.61a | 35.33±3.1a   | 26.77±2.12abc | 47.87±1.37ab | 1.36±0.04bc            | 9.708±0.72abc | 16.74±0.62ab | 87.5±11.54ab    | 1.39±0.04a | 10.01±1.03a | 0.37±0.01a | 164.98±11.35ab | 2.05±0.27a  | 168.25±12.21ab | 53.25±6.57b  |
|                 | EleA5    | 12.99±1.84a | 18.59±0.42a | 40.35±2.48ab | 31.02±1.59bc  | 51.34±1.12ab | 1.28±0.03bc            | 15.88±0.96bc  | 27.38±0.54b  | 146.7±13.17bc   | 1.03±0.01a | 12.26±1.01a | 0.38±0.01a | 179.11±13.05ab | 1.68±0.14a  | 198.04±17.22ab | 45.91±4.41ab |
|                 | EleA6    | 14.86±1.81a | 18.58±0.71a | 45.49±2.47b  | 33.66±1.62c   | 53.37±0.98b  | 1.23±0.04c             | 19.869±0.92c  | 34.29±0.73b  | 164.64±19.06c   | 2.09±0.05a | 6.64±0.06a  | 0.33±0.02a | 139.64±9.06ab  | 4.32±0.18b  | 198.98±16.69b  | 90.38±4.53c  |
| Mixed<br>stands | EleB1    | 13.87±1.32a | 18.45±0.67a | 35.60±1.09b  | 28.17±0.69b   | 48.78±1.21a  | 1.37±0.01a             | 9.51±1.67a    | 16.39±2.86a  | 59.5±3.18a      | 2.79±0.06a | 6.54±1.15a  | 0.33±0.02a | 162.54±16.87a  | 3.18±0.52ab | 68.73±5.43a    | 33.61±6.43b  |
|                 | EleB2    | 14.03±1.01a | 17.03±0.52a | 34.65±1.07ab | 27.48±0.61b   | 48.01±1.09a  | 1.39±0.02a             | 9.53±1.72a    | 16.42±2.91a  | 76.53±7.16a     | 1.91±0.03a | 9.79±1.21a  | 0.31±0.01a | 142.04±13.32a  | 3.83±0.53b  | 176.02±15.46ab | 45.99±3.45b  |
|                 | EleB3    | 13.44±1.18a | 17.78±0.53a | 30.61±1.89a  | 24.78±0.53a   | 45.29±1.15a  | 1.48±0.02b             | 12.63±1.69ab  | 21.78±3.81ab | 63.17±8.29a     | 1.42±0.07a | 6.75±1.32a  | 0.30±0.01a | 245.36±15.76a  | 2.92±0.31ab | 147.66±12.48ab | 35.11±3.12b  |
|                 | EleB4    | 11.17±1.31a | 17.24±0.41a | 31.26±1.37a  | 24.15±1.12a   | 46.75±1.31a  | 1.49±0.03b             | 16.23±1.31b   | 27.97±2.89b  | 88.2±13.18a     | 2.41±0.07a | 7.83±1.02a  | 0.34±0.03a | 165.72±13.57a  | 2.69±0.34ab | 230.27±16.36b  | 41.69±4.17b  |
|                 | EleB5    | 13.87±2.21a | 17.18±0.54a | 32.75±1.92ab | 24.93±1.37a   | 47.36±2.09a  | 1.45±0.05ab            | 29.53±2.89c   | 50.905±4.89c | 52.50±6.89a     | 1.3±0.08a  | 6.07±1.17a  | 0.42±0.05a | 187.27±12.76a  | 1.51±0.26a  | 64.31±4.65a    | 7.68±1.82a   |

Note: SW: soil water content; ST: soil temperature; SMaxW: maximum soil water holding capacity; SMinW: minimum soil water holding capacity; SP: soil porosity; BD: soil bulk weight; SOC: soil organic carbon; SOM: soil organic matter; AN: alkaline nitrogen; TN: total nitrogen; AP: fast-acting phosphorus; TP: total phosphorus; AK: fast-acting potassium; INV: sucrase; URE: urease; PHO: alkaline phosphatase; different letters represent differences between elevations of the same stand type reaching significance level (P<0.05)

**Table S3.** Variation of soil physicochemical factors under different altitudes and forest types in the 10-20 cm soil layer

|              | Altitude | SW(%)       | ST(℃)       | SMaxW (g)    | SMinW (g)    | SP(%)       | BD (g/cm³)   | SOC (g/kg)  | SOM(g/kg)   | AN(mg/kg)     | TN(g/kg)    | AP(mg/kg)   | TP(g/kg)    | AK(mg/kg)     | INV (mg)    | URE (mg)       | PHO (mg)      |
|--------------|----------|-------------|-------------|--------------|--------------|-------------|--------------|-------------|-------------|---------------|-------------|-------------|-------------|---------------|-------------|----------------|---------------|
| Pure stands  | EleA1    | 8.95±2.13a  | 18.32±0.91a | 37.05±6.03ab | 24.32±1.55ab | 47.16±3.06a | 1.28±0.018ab | 13.96±1.81a | 24.08±2.57a | 124.25±11.35a | 3.23±0.02b  | 5.59±1.01a  | 0.4±0.01ab  | 133.29±16.15a | 6.88±0.86b  | 195.80±17.88c  | 51.29±5.42bc  |
|              | EleA2    | 10.34±2.75a | 17.76±0.73a | 29.28±4.93a  | 20.32±1.72a  | 45.47±2.49a | 1.56±0.034c  | 11.37±1.25a | 19.60±1.93a | 99.4±9.33a    | 1.39±0.01a  | 6.54±0.91a  | 0.52±0.02ab | 137.58±15.52a | 2.68±0.63a  | 91.22±9.76a    | 47.38±3.32ab  |
|              | EleA3    | 16.56±3.37a | 17.84±0.69a | 30.85±4.65a  | 22.72±1.28a  | 46.04±2.36a | 1.5±0.032c   | 13.69±1.57a | 23.62±2.18a | 111.3±9.82a   | 1.42±0.03a  | 19.13±2.07a | 0.81±0.01b  | 132.72±13.25a | 3.11±0.32a  | 117.79±10.12ab | 36.78±3.61a   |
|              | EleA4    | 16.61±2.12a | 16.68±0.71a | 34.36±4.37ab | 28.32±2.81ab | 46.85±2.51a | 1.38±0.037bc | 15.16±1.08a | 26.14±2.09a | 92.5±8.25a    | 1.58±0.01a  | 7.40±1.41a  | 0.32±0.03a  | 102.79±16.24a | 2.93±0.31a  | 161.25±12.47bc | 39.43±4.17abc |
|              | EleA5    | 17.50±2.33a | 17.63±0.64a | 46.53±3.81b  | 35.34±1.93b  | 52.70±1.94a | 1.24±0.019ab | 11.85±1.29a | 20.43±2.17a | 103.72±7.29a  | 1.07±0.03a  | 25.28±3.72a | 0.29±0.01a  | 150.81±12.32a | 2.54±0.51a  | 139.36±9.63abc | 53.86±5.22bc  |
|              | EleA6    | 13.05±2.09a | 17.81±0.77a | 41.92±4.23ab | 28.26±2.04ab | 48.59±2.19a | 1.172±0.039a | 13.73±1.05a | 23.66±2.05a | 103.95±7.53a  | 1.73±0.02a  | 6.01±1.18a  | 0.25±0.03a  | 82.63±11.89a  | 4.43±0.62ab | 201.18±12.79c  | 61.83±5.73c   |
| Mixed stands | EleB1    | 13.5±1.14b  | 17.00±0.91a | 35.53±1.56b  | 25.42±0.92ab | 48.75±1.51a | 1.37±0.029a  | 11.31±1.21a | 19.48±2.11a | 86.78±15.68a  | 1.31±0.01ab | 6.29±1.27a  | 0.45±0.03a  | 106.71±12.76  | 4.49±0.39a  | 160.42±9.36a   | 30.95±3.34b   |
|              | EleB2    | 13.91±1.13b | 16.34±0.93a | 32.86±1.41ab | 27.48±0.87b  | 45.33±1.63a | 1.38±0.039a  | 10.77±1.09a | 18.57±2.05a | 110±12.57a    | 3.40±0.17a  | 10.12±0.87a | 0.443±0.04a | 83.66±10.82   | 3.64±0.46a  | 165.01±11.34b  | 35.95±3.21b   |
|              | EleB3    | 13.20±1.09b | 16.08±0.91a | 29.39±1.51a  | 23.09±0.82a  | 44.81±1.58a | 1.53±0.034b  | 12.03±1.15a | 20.75±2.01a | 66.5±9.82a    | 1.33±0.07ab | 8.22±0.93a  | 0.32±0.01a  | 185.02±12.53  | 2.61±0.31a  | 139.14±10.19b  | 27.38±3.31b   |
|              | EleB4    | 13.98±0.87a | 16.12±0.87a | 32.14±2.14ab | 23.68±0.91a  | 47.43±1.17a | 1.49±0.027b  | 14.29±2.11a | 24.64±1.95a | 58.8±6.27a    | 0.97±0.03a  | 7.04±1.19a  | 0.42±0.05a  | 127.77±11.98  | 3.56±0.45a  | 216.85±12.22a  | 39.48±3.15a   |
|              | EleB5    | 13.28±1.91b | 15.93±1.19a | 33.43±2.71ab | 22.07±1.59a  | 46.14±2.62a | 1.38±0.037a  | 12.77±1.23a | 22.01±3.63a | 49.70±4.21a   | 0.97±0.04a  | 6.18±1.05a  | 0.42±0.04a  | 87.84±9.13    | 1.80±0.19a  | 49.23±6.96b    | 4.12±0.85b    |
| ANONA        |          |             |             |              |              |             |              |             |             |               |             |             |             |               |             |                |               |
|              | A        | 1.249ns     | 1.876ns     | 4.403***     | 3.704**      | 2.116ns     | 11.16***     | 7.801***    | 7.802***    | 0.944ns       | 1.718ns     | 0.427ns     | 1.891ns     | 1.538ns       | 5.621***    | 6.291***       | 12.926***     |
|              | F        | 1.025ns     | 11.10***    | 2.613ns      | 0.401ns      | 2.162ns     | 2.700ns      | 1.499ns     | 1.497ns     | 12.236***     | 0.286ns     | 0.974ns     | 1.843ns     | 0.035ns       | 0.848ns     | 2.162ns        | 4.551*        |
|              | S        | 0.339ns     | 5.542*      | 0.114ns      | 1.127ns      | 2.628ns     | 0.235ns      | 6.251*      | 6.259*      | 0.485ns       | 0.337ns     | 0.137ns     | 0.284ns     | 9.757**       | 0.941ns     | 2.466ns        | 3.387ns       |
|              | A×F      | 4.081**     | 1.914ns     | 1.471ns      | 4.075**      | 1.203ns     | 4.364**      | 4.743***    | 4.744***    | 2.027ns       | 1.980ns     | 0.435ns     | 2.640*      | 2.013ns       | 4.943***    | 8.643***       | 5.986***      |
|              | F×S      | 0.106ns     | 0.070ns     | 0.020ns      | 0.826ns      | 0.063ns     | 0.009ns      | 5.494*      | 5.493*      | 0.368ns       | 1.087ns     | 0.181ns     | 0.157ns     | 0.958ns       | 1.325ns     | 0.193ns        | 0.168ns       |
|              | A×S      | 0.283ns     | 0.007ns     | 0.479ns      | 1.059ns      | 0.615ns     | 0.945ns      | 6.224***    | 6.226***    | 1.338ns       | 1.079ns     | 0.261ns     | 0.254ns     | 0.399ns       | 0.349ns     | 0.220ns        | 1.514ns       |
|              | A×F×S    | 0.287ns     | 0.024ns     | 0.182ns      | 0.746ns      | 0.266ns     | 0.567ns      | 2.675*      | 2.675*      | 0.417ns       | 2.075ns     | 0.197ns     | 0.134ns     | 0.577ns       | 0.317ns     | 0.106ns        | 0.255ns       |

Note: A is for Altitude, F is for Stand Type, S is for Soil depth; different letters represent differences between elevations of the same stand type reaching significance level (P<0.05); \* represents P<0.05, \*\* represents P<0.01, \*\*\* represents

P<0.001

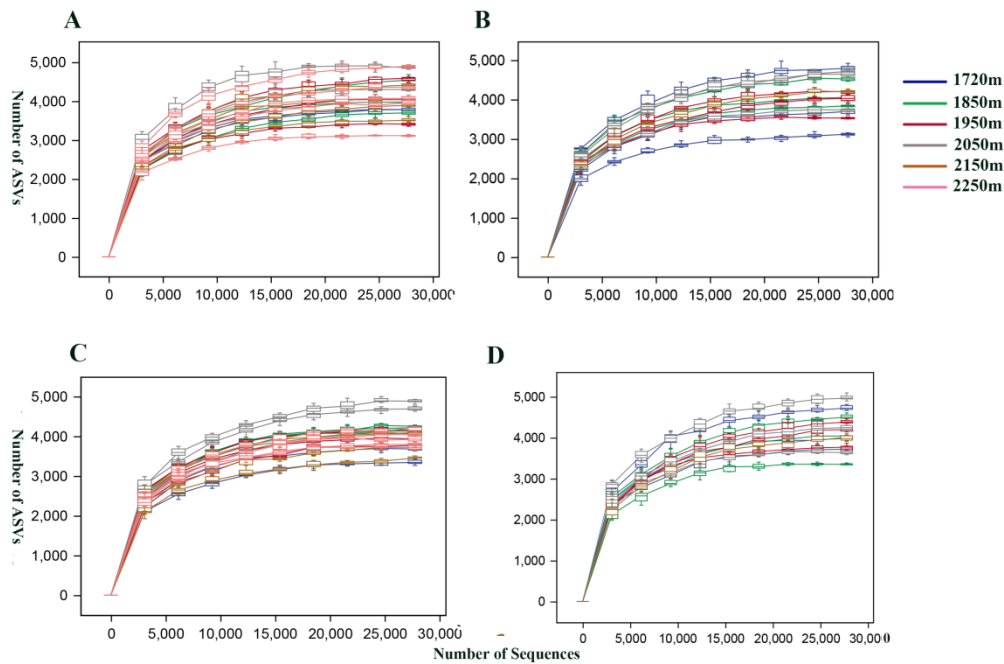

**Figure S1.** Dilution curves of amplicon sequence variants (ASVs) of soil bacterial communities from two stand types and soil depths at different elevations.

Note: Each sample contains a random subsample of 27,767 16S rRNA genes to generate dilution curves. All ASVs are described at 100% sequence similarity. Figure A and B represent soil bacteria in the 0-10 cm layer in a pure larch forest and a mixed larch-birch forest in northern China, respectively, and Figure C and D represent soil bacteria in the 10-20cm layer in a pure larch forest and a mixed larch-birch forest in northern China, respectively

**Table S4.** Mantel test results for the correlation between soil bacterial community and soil variables

| Soil variables | Pure stands    |         | Mixed stands   |         |
|----------------|----------------|---------|----------------|---------|
|                | R <sup>2</sup> | P       | R <sup>2</sup> | P       |
| SW             | 0.142          | 0.093   | 0.019          | 0.453   |
| SMaxW          | 0.131          | 0.131   | 0.094          | 0.224   |
| SMinW          | 0.065          | 0.233   | 0.058          | 0.266   |
| SP             | 0.126          | 0.121   | 0.047          | 0.341   |
| BD             | 0.163          | 0.059   | 0.023          | 0.384   |
| ST             | 0.078          | 0.796   | 0.363          | 0.008** |
| SOC            | 0.131          | 0.11    | 0.006          | 0.361   |
| SOM            | 0.138          | 0.101   | 0.006          | 0.361   |
| AN             | 0.320          | 0.005** | 0.142          | 0.799   |
| TN             | 0.006          | 0.415   | 0.064          | 0.292   |
| AP             | 0.035          | 0.539   | 0.046          | 0.361   |
| TP             | 0.008          | 0.39    | 0.293          | 0.046*  |
| AK             | 0.202          | 0.017*  | 0.150          | 0.805   |
| INV            | 0.189          | 0.052   | 0.037          | 0.293   |
| URE            | 0.008          | 0.445   | 0.094          | 0.758   |
| PHO            | 0.097          | 0.884   | 0.120          | 0.798   |

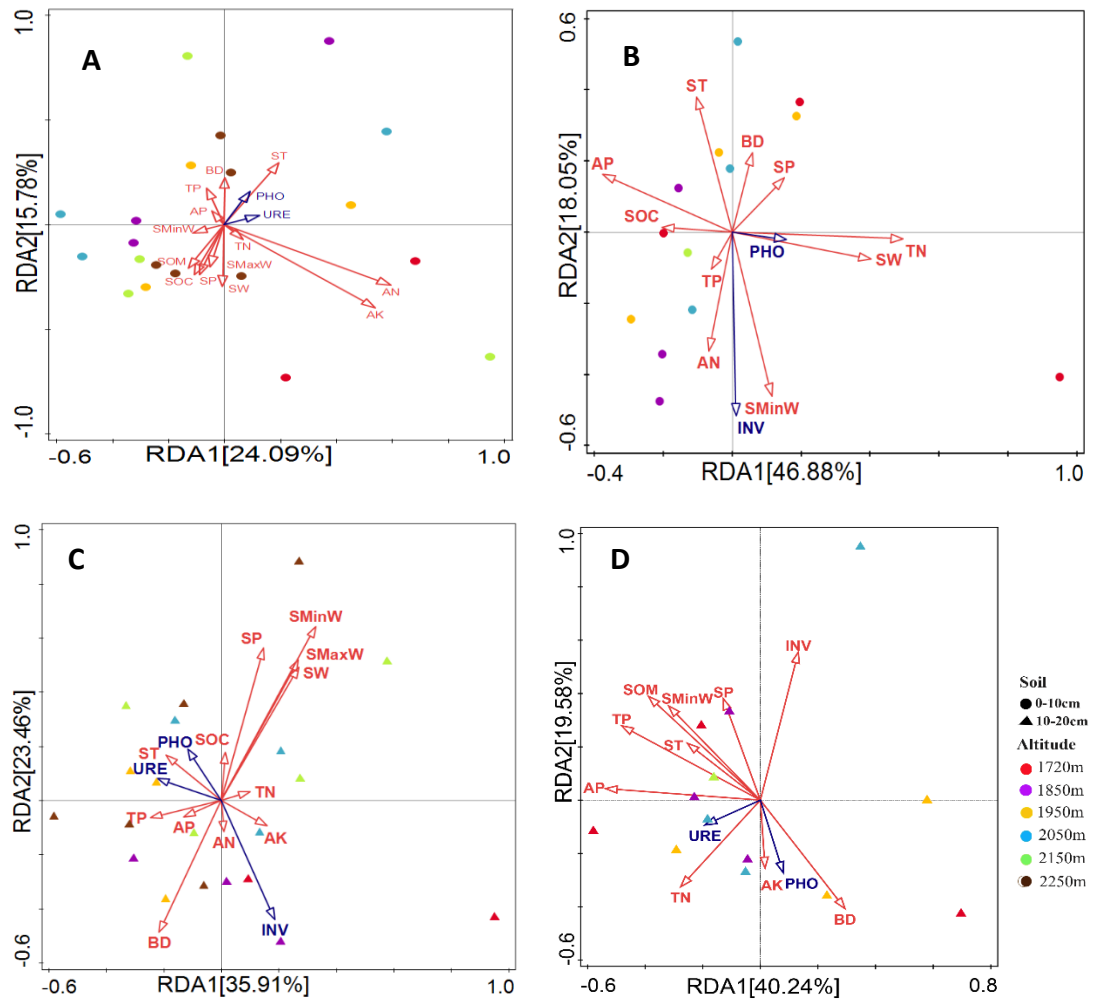

**Figure S2.** Redundancy analysis based on pure stands (A, C) and mixed stands (B, D) at the genus level and soil factors (red and blue arrows).

Note: Direction of arrow indicates the soil factors associated with changes in the community structure, and the length of the arrow indicates the magnitude of the association. The percentage of variation explained by RDA 1 and 2 is shown. SW: soil water content; SMaxW: maximum soil water holding capacity; SminW: minimum soil water holding capacity; BD: soil bulk density; ST: soil temperature; SOC: soil organic carbon; SOM: soil organic matter; TN: total nitrogen; TP: total phosphorus; AP: fast-acting phosphorus; AN: alkaline dissolved nitrogen; AK: fast-acting Potassium; PHO: alkaline phosphatase; INV: sucrose; URE: urease.

**Table S5.** Spearman analysis of relative abundance of soil bacterial communities and environmental factors in pure stands

| Phylum                     | Altitude   | SW       | SMaxW      | SMinW     | SP        | BD      | ST     | SOC    | SOM    | AN     | TN     | AP     | TP      | AK     | INV       | URE         | PHO       |
|----------------------------|------------|----------|------------|-----------|-----------|---------|--------|--------|--------|--------|--------|--------|---------|--------|-----------|-------------|-----------|
| <i>Euryarchaeota</i>       | -0.122     | -0.157   | (-0.326)*  | -0.051    | -0.287    | 0.283   | -0.103 | 0.039  | 0.039  | 0.006  | -0.176 | -0.015 | -0.034  | -0.078 | 0.122     | -0.168      | -0.18     |
| <i>Acidobacteria</i>       | 0.321*     | -0.057   | 0.025      | -0.064    | 0.038     | -0.023  | 0.149  | 0.198  | 0.194  | 0.137  | -0.03  | -0.034 | 0.092   | -0.069 | 0.128     | 0.117       | 0.036     |
| <i>Actinobacteria</i>      | (-0.434)** | -0.205   | -0.181     | -0.054    | -0.123    | 0.197   | -0.038 | -0.082 | -0.083 | -0.002 | -0.003 | -0.117 | 0.084   | 0.022  | 0.148     | -0.157      | 0.019     |
| <i>Armatimonadetes</i>     | -0.024     | -0.302   | 0.179      | 0.019     | 0.211     | -0.154  | 0.272  | 0.147  | 0.14   | -0.069 | -0.194 | 0.119  | -0.051  | 0.21   | 0.142     | 0.31*       | 0.05      |
| <i>BRC1</i>                | 0.082      | -0.078   | 0.104      | 0.038     | 0.129     | -0.09   | 0.127  | 0.03   | 0.027  | -0.078 | -0.194 | -0.021 | -0.014  | 0.095  | 0.033     | 0.072       | -0.043    |
| <i>Bacteroidetes</i>       | -0.035     | 0.076    | -0.038     | -0.09     | -0.119    | -0.032  | -0.082 | -0.018 | -0.015 | 0.166  | 0.088  | -0.059 | -0.193  | 0.25   | 0.075     | 0.029       | -0.039    |
| <i>Chlamydiae</i>          | 0.074      | 0.105    | -0.194     | -0.164    | -0.098    | 0.21    | -0.077 | -0.118 | -0.12  | -0.101 | -0.187 | 0.071  | 0.187   | -0.001 | (-0.312)* | -0.141      | (-0.31)*  |
| <i>Chloroflexi</i>         | 0.271      | 0.025    | 0.241      | 0.273     | 0.292     | -0.148  | 0.292  | -0.162 | -0.156 | -0.089 | 0.011  | 0.264  | 0.075   | -0.128 | -0.243    | 0.12        | 0.11      |
| <i>Cyanobacteria</i>       | -0.061     | 0.072    | -0.289     | -0.091    | -0.192    | 0.282   | -0.11  | -0.231 | -0.229 | -0.146 | -0.194 | -0.036 | 0.037   | -0.206 | -0.005    | -0.087      | -0.34     |
| <i>Dadabacteria</i>        | -0.142     | 0.058    | -0.282     | -0.197    | -0.24     | 0.289   | -0.091 | 0.051  | 0.051  | -0.029 | -0.071 | -0.128 | 0.136   | 0.004  | 0.184     | -0.137      | (-0.327)* |
| <i>Deinococcus_Thermus</i> | 0.051      | -0.111   | 0.155      | -0.075    | -0.053    | -0.257  | -0.072 | -0.005 | -0.005 | 0.041  | 0.102  | -0.36  | -0.108  | 0.085  | 0.038     | -0.074      | 0.218     |
| <i>Dependentiae</i>        | -0.019     | 0.1      | -0.248     | -0.237    | -0.33     | 0.155   | -0.276 | -0.151 | -0.143 | -0.103 | -0.078 | 0.183  | 0.201   | -0.049 | (-0.35)*  | -0.235      | (-0.313)* |
| <i>Elusimicrobia</i>       | -0.094     | -0.207   | -0.047     | -0.091    | 0         | 0.093   | 0.285  | -0.183 | -0.175 | -0.145 | -0.092 | 0.043  | 0.22    | -0.152 | -0.091    | 0.013       | -0.133    |
| <i>Entotheonellaeota</i>   | -0.057     | -0.027   | -0.124     | -0.126    | -0.052    | 0.176   | -0.004 | 0.154  | 0.148  | 0.037  | 0.047  | 0.192  | 0.337*  | 0.023  | -0.004    | 0.02        | -0.025    |
| <i>Epsilonbacteraeota</i>  | -0.02      | 0.258    | 0.082      | 0.19      | 0.046     | -0.058  | -0.155 | 0.149  | 0.149  | -0.164 | 0.049  | -0.067 | -0.007  | -0.011 | 0.06      | 0.13        | 0.045     |
| <i>FBP</i>                 | 0.21       | -0.2     | 0.257      | 0.297     | 0.318*    | -0.201  | 0.153  | 0.03   | 0.03   | -0.201 | -0.129 | 0.018  | -0.011  | -0.266 | -0.038    | 0.245       | -0.035    |
| <i>FCPU426</i>             | -0.192     | 0.215    | -0.183     | -0.038    | -0.034    | 0.3     | -0.057 | 0.001  | 0.006  | -0.228 | -0.022 | 0.268  | 0.43**  | -0.087 | (-0.327)* | -0.13       | -0.467    |
| <i>Fibrobacteres</i>       | (-0.381)*  | -0.169   | (-0.462)** | (-0.386)* | (-0.341)* | 0.455** | -0.176 | -0.291 | -0.285 | -0.208 | -0.214 | 0.187  | 0.233   | -0.243 | -0.107    | (-0.515)*** | -0.458    |
| <i>Firmicutes</i>          | (-0.471)** | 0.207    | -0.087     | -0.169    | -0.01     | 0.075   | -0.107 | -0.276 | -0.28  | -0.237 | -0.089 | 0.163  | 0.15    | 0.243  | -0.279    | -0.074      | -0.293    |
| <i>Fusobacteria</i>        | -0.2       | 0.135    | -0.198     | -0.174    | -0.093    | 0.257   | -0.201 | -0.282 | -0.275 | -0.16  | -0.097 | 0.174  | 0.036   | 0.137  | -0.17     | -0.109      | -0.269    |
| <i>GAL15</i>               | 0.236      | 0.515*** | 0.29       | 0.382*    | 0.313*    | -0.226  | 0.19   | 0.157  | 0.163  | 0.244  | 0.307  | -0.247 | -0.04   | -0.038 | -0.208    | 0.137       | -0.058    |
| <i>Gemmatimonadetes</i>    | -0.126     | -0.188   | -0.018     | -0.056    | 0.148     | 0.139   | 0.225  | -0.24  | -0.233 | -0.279 | -0.059 | 0.399* | 0.428** | -0.183 | -0.271    | -0.096      | -0.107    |
| <i>Hydrogenedentes</i>     | 0.159      | 0.035    | -0.1       | -0.019    | -0.084    | 0.113   | -0.059 | 0.186  | 0.186  | 0.079  | -0.087 | -0.259 | 0.002   | 0.293  | -0.097    | -0.132      | 0.045     |

|                           |        |         |        |        |        |        |           |        |        |        |        |        |        |        |           |        |        |
|---------------------------|--------|---------|--------|--------|--------|--------|-----------|--------|--------|--------|--------|--------|--------|--------|-----------|--------|--------|
| <i>Kiritimatiellaeota</i> | -0.014 | 0.201   | -0.007 | 0.09   | 0      | 0.056  | -0.229    | 0.236  | 0.236  | -0.243 | -0.09  | -0.111 | -0.09  | 0.021  | 0.021     | 0.062  | -0.118 |
| <i>Latescibacteria</i>    | 0.028  | 0.017   | 0.08   | 0.039  | 0.202  | 0.016  | 0.324*    | -0.121 | -0.112 | -0.105 | 0.054  | 0.196  | 0.244  | -0.114 | -0.276    | 0.076  | -0.103 |
| <i>Margulisbacteria</i>   | -0.183 | 0.132   | 0.076  | 0.104  | 0.16   | -0.076 | 0.229     | -0.215 | -0.215 | -0.187 | -0.104 | -0.007 | 0.118  | 0.062  | -0.076    | 0.208  | -0.132 |
| <i>Nitrospirae</i>        | 0.301  | 0.433** | 0.314* | 0.199  | 0.312* | -0.269 | 0.268     | 0.18   | 0.186  | 0.331* | 0.266  | 0.037  | 0.129  | 0.178  | (-0.315)* | 0.226  | -0.037 |
| <i>Omnitrophicaeota</i>   | 0.149  | 0.225   | 0.232  | 0.083  | 0.193  | -0.197 | 0.17      | 0.179  | 0.183  | 0.059  | 0.169  | -0.248 | 0.013  | 0.027  | 0.114     | 0.169  | -0.069 |
| <i>Patescibacteria</i>    | -0.042 | -0.334  | -0.145 | -0.179 | -0.228 | 0.031  | -0.062    | -0.129 | -0.133 | -0.028 | -0.044 | -0.062 | -0.182 | 0.016  | 0.245     | -0.061 | -0.016 |
| <i>Planctomycetes</i>     | 0.144  | 0.095   | 0.051  | 0.094  | 0.185  | 0.058  | 0.242     | 0.05   | 0.057  | 0.043  | 0.203  | 0.16   | 0.076  | 0.064  | -0.108    | 0.181  | -0.056 |
| <i>Proteobacteria</i>     | 0.017  | 0.11    | -0.062 | -0.074 | -0.183 | -0.037 | (-0.327)* | 0.018  | 0.017  | -0.127 | -0.015 | -0.2   | -0.341 | 0.051  | 0.128     | -0.046 | -0.076 |
| <i>Rokubacteria</i>       | 0.38*  | 0.3     | 0.314* | 0.28   | 0.351* | -0.256 | 0.418**   | 0.153  | 0.155  | 0.376* | 0.296  | 0.017  | 0.014  | 0.008  | -0.207    | 0.222  | 0.14   |
| <i>Spirochaetes</i>       | 0.133  | 0.247   | 0.112  | 0.062  | 0.144  | -0.08  | 0.253     | -0.107 | -0.095 | 0.086  | 0.391* | 0.22   | 0.062  | 0.052  | -0.32     | 0.075  | -0.001 |
| <i>Tenericutes</i>        | -0.127 | -0.134  | -0.079 | 0.071  | 0.015  | 0.093  | 0.046     | -0.272 | -0.283 | -0.084 | -0.294 | 0.191  | 0.116  | -0.088 | -0.037    | 0.104  | -0.072 |
| <i>Verrucomicrobia</i>    | 0.089  | -0.083  | -0.218 | -0.04  | -0.031 | 0.312* | -0.13     | 0.111  | 0.105  | -0.162 | -0.242 | 0.255  | 0.08   | -0.035 | 0.004     | -0.061 | -0.094 |
| WPS_2                     | -0.162 | -0.296  | -0.093 | -0.057 | -0.08  | 0.107  | 0.063     | -0.081 | -0.087 | 0.158  | -0.132 | -0.128 | 0.189  | -0.23  | 0.269     | -0.052 | -0.027 |
| WS2                       | 0.113  | -0.223  | -0.05  | -0.037 | -0.04  | 0.027  | -0.095    | 0.035  | 0.034  | -0.037 | 0.075  | 0.09   | -0.092 | -0.234 | 0.283     | 0.078  | 0.334* |
| <i>Zixibacteria</i>       | 0.05   | 0.095   | 0.175  | 0.048  | 0.178  | -0.179 | 0.32*     | -0.094 | -0.096 | 0.041  | 0.231  | -0.031 | 0.096  | -0.074 | -0.023    | 0.098  | 0.149  |

Note: SW: soil water content; SMaxW: maximum soil water holding capacity; SminW: minimum soil water holding capacity; BD: soil bulk density; ST: soil temperature; SOC: soil organic carbon; SOM: soil organic matter; TN: total nitrogen; TP: total phosphorus; AP: fast-acting phosphorus; AN: alkaline dissolved nitrogen; AK: fast-acting Potassium; PHO: alkaline phosphatase; INV: sucrase; URE: urease; \* represents P<0.05, \*\* represents P<0.01; \*\*\* represents P<0.001



**Table S6.** Spearman analysis of relative abundance of soil bacterial communities and environmental factors in mixed stands

| Phylum                     | Altitude | SW     | SMaxW  | SMinW     | SP     | BD     | ST     | SOC         | SOM         | AN      | TN     | AP        | TP     | AK        | INV    | URE       | PHO    |
|----------------------------|----------|--------|--------|-----------|--------|--------|--------|-------------|-------------|---------|--------|-----------|--------|-----------|--------|-----------|--------|
| <i>Euryarchaeota</i>       | -0.109   | -0.04  | 0.227  | 0.307     | 0.2    | -0.16  | -0.253 | -0.307      | -0.307      | 0.093   | 0.227  | 0.334     | 0.308  | -0.333    | -0.253 | 0.147     | -0.12  |
| <i>Acidobacteria</i>       | 0.335    | -0.287 | 0.003  | -0.068    | 0.034  | -0.079 | 0.035  | 0.554**     | 0.554**     | -0.046  | -0.355 | 0.488*    | 0.199  | -0.134    | 0.247  | 0.204     | -0.139 |
| <i>Actinobacteria</i>      | -0.241   | 0.262  | 0.344  | 0.13      | 0.205  | -0.237 | 0.027  | (-0.644)*** | (-0.644)*** | -0.098  | 0.24   | (-0.468)* | 0.126  | 0.173     | -0.09  | (-0.395)* | -0.145 |
| <i>Armatimonadetes</i>     | 0.013    | 0.262  | 0.036  | 0.058     | 0.204  | -0.015 | 0.121  | -0.227      | -0.227      | -0.187  | -0.036 | -0.159    | -0.054 | -0.135    | -0.121 | -0.228    | -0.145 |
| <i>BRC1</i>                | -0.097   | -0.185 | 0.221  | 0.266     | 0.306  | -0.083 | 0.269  | -0.22       | -0.22       | 0.014   | -0.049 | 0.233     | -0.048 | -0.24     | -0.2   | -0.028    | -0.148 |
| <i>Bacteroidetes</i>       | 0.062    | 0.198  | -0.179 | -0.125    | -0.225 | -0.009 | 0.113  | 0.188       | 0.188       | -0.131  | 0.014  | -0.138    | 0.014  | -0.066    | -0.045 | -0.26     | -0.097 |
| <i>Chlamydiae</i>          | -0.237   | 0.142  | -0.002 | 0.186     | 0.01   | -0.158 | 0.135  | 0.04        | 0.04        | -0.163  | -0.004 | 0.145     | 0.136  | -0.158    | 0.396* | -0.247    | -0.187 |
| <i>Chloroflexi</i>         | 0.385    | 0.214  | -0.275 | (-0.414)* | -0.091 | 0.353  | -0.07  | 0.169       | 0.169       | 0.21    | 0.244  | 0.357     | 0.029  | 0.168     | -0.263 | 0.341     | 0.05   |
| <i>Cyanobacteria</i>       | 0.139    | -0.08  | 0.132  | 0.175     | 0.107  | -0.134 | 0.436* | 0.108       | 0.108       | -0.126  | -0.211 | -0.437    | 0.408* | -0.078    | 0.027  | -0.387    | -0.372 |
| <i>Dadabacteria</i>        | 0.055    | -0.107 | -0.253 | 0.067     | -0.307 | 0.133  | 0.28   | -0.027      | -0.027      | -0.067  | -0.147 | -0.254    | -0.227 | -0.067    | 0.12   | -0.307    | 0.067  |
| <i>Deinococcus_Thermus</i> | -0.109   | 0.333  | 0.2    | -0.04     | 0.227  | -0.04  | 0.173  | -0.267      | -0.267      | -0.173  | -0.253 | 0.12      | -0.294 | -0.2      | 0.173  | -0.013    | 0.173  |
| <i>Dependentiae</i>        | 0.129    | 0.281  | -0.368 | -0.138    | -0.095 | 0.447* | -0.305 | 0.335       | 0.335       | 0.178   | 0.193  | 0.348     | -0.151 | 0.268     | -0.096 | 0.395*    | 0.188  |
| <i>Elusimicrobia</i>       | 0.078    | -0.054 | 0.047  | -0.084    | 0.103  | -0.021 | 0.183  | 0.091       | 0.091       | -0.179  | -0.316 | 0.3       | 0.198  | (-0.422)* | -0.052 | 0.152     | -0.297 |
| <i>Entotheonellaeota</i>   | -0.17    | -0.135 | 0.319  | 0.348     | 0.223  | -0.298 | 0.218  | -0.195      | -0.195      | -0.114  | 0.149  | 0.212     | 0.195  | -0.091    | -0.344 | -0.082    | -0.284 |
| <i>FCPU426</i>             | -0.058   | 0.247  | 0.269  | 0.022     | 0.413* | -0.078 | 0.081  | -0.161      | -0.161      | -0.247  | 0.302  | 0.243     | -0.012 | 0.326     | -0.304 | 0.161     | 0.128  |
| <i>Fibrobacteres</i>       | -0.069   | 0.218  | 0.078  | -0.087    | 0.129  | -0.066 | -0.12  | -0.251      | -0.251      | 0.022   | -0.122 | 0.458     | -0.039 | -0.351    | -0.104 | -0.019    | -0.296 |
| <i>Firmicutes</i>          | 0.021    | -0.071 | -0.244 | -0.015    | 0.005  | 0.431* | -0.175 | 0.114       | 0.114       | 0.408*  | 0.359  | -0.055    | 0.083  | 0.225     | -0.138 | 0.272     | 0.397* |
| <i>Fusobacteria</i>        | 0.212    | -0.367 | -0.058 | -0.001    | -0.053 | 0.092  | -0.068 | -0.014      | -0.014      | 0.136   | -0.091 | -0.06     | -0.049 | 0.019     | -0.085 | 0.24      | -0.025 |
| <i>GAL15</i>               | -0.292   | -0.167 | 0.284  | 0.488*    | 0.29   | -0.266 | -0.439 | -0.053      | -0.053      | 0.503** | 0.446* | 0.518**   | 0.029  | 0.074     | 0.203  | 0.27      | 0.09   |
| <i>Gemmatimonadetes</i>    | 0.184    | -0.101 | 0.126  | -0.08     | 0.186  | -0.089 | -0.004 | 0.182       | 0.182       | -0.146  | 0.127  | 0.427*    | 0.435* | -0.063    | -0.164 | 0.36      | 0.027  |
| <i>Hydrogenedentes</i>     | -0.273   | -0.2   | 0.173  | 0.173     | 0.12   | -0.12  | -0.093 | 0.08        | 0.08        | 0.307   | -0.307 | 0.214     | 0.04   | -0.307    | -0.04  | -0.04     | -0.253 |
| <i>Kiritimatiellaeota</i>  | 0.055    | 0.093  | -0.067 | -0.093    | -0.08  | 0.053  | -0.227 | 0.04        | 0.04        | 0.013   | 0.093  | 0.294     | -0.04  | 0.307     | 0.307  | 0.173     | 0.013  |

|                         |           |        |         |        |           |            |           |           |           |        |        |           |           |           |        |        |        |
|-------------------------|-----------|--------|---------|--------|-----------|------------|-----------|-----------|-----------|--------|--------|-----------|-----------|-----------|--------|--------|--------|
| <i>Latescibacteria</i>  | -0.006    | 0.018  | 0.124   | 0.048  | 0.094     | -0.159     | -0.142    | 0.052     | 0.052     | -0.014 | 0.24   | 0.667***  | 0.005     | -0.094    | -0.087 | 0.359  | 0.08   |
| <i>Nitrospirae</i>      | -0.014    | 0.254  | -0.113  | -0.248 | 0.055     | 0.137      | 0.119     | 0.311     | 0.311     | -0.054 | 0.097  | 0.428*    | -0.129    | -0.027    | -0.013 | 0.17   | 0.296  |
| <i>Omnitrophicaeota</i> | -0.242    | -0.174 | 0.341   | 0.268  | 0.147     | -0.389     | 0.135     | -0.212    | -0.212    | -0.116 | 0.083  | -0.019    | 0.459*    | -0.303    | 0      | -0.13  | -0.184 |
| <i>Patescibacteria</i>  | 0.066     | 0.1    | -0.039  | 0.092  | -0.169    | -0.011     | 0.082     | -0.178    | -0.178    | -0.091 | -0.001 | -0.315    | 0.109     | -0.028    | -0.195 | -0.134 | -0.117 |
| <i>Planctomycetes</i>   | (-0.399)* | -0.003 | 0.508** | 0.422* | 0.451*    | (-0.501)** | 0.089     | -0.245    | -0.245    | -0.035 | -0.137 | 0.054     | 0.072     | (-0.51)** | 0.042  | -0.212 | -0.289 |
| <i>Proteobacteria</i>   | -0.1      | 0.007  | -0.269  | -0.063 | -0.301    | 0.232      | -0.105    | 0.025     | 0.025     | 0.104  | -0.249 | (-0.398)* | (-0.431)* | 0.054     | 0.239  | 0.01   | 0.263  |
| <i>Rokubacteria</i>     | 0.172     | -0.145 | 0.091   | 0.084  | 0.121     | -0.116     | -0.257    | 0.281     | 0.281     | 0.131  | -0.109 | 0.723***  | -0.119    | 0.021     | 0.116  | 0.298  | -0.171 |
| <i>Spirochaetes</i>     | 0.201     | -0.025 | -0.06   | 0.025  | 0.01      | 0.06       | (-0.391)* | 0.082     | 0.082     | 0.043  | 0.296  | 0.509**   | -0.01     | 0.322     | -0.091 | 0.485  | 0.058  |
| <i>Synergistetes</i>    | 0.263     | 0.142  | -0.136  | -0.344 | -0.234    | 0.097      | -0.051    | -0.001    | -0.001    | -0.117 | -0.164 | 0.06      | 0.064     | 0.086     | -0.181 | 0.054  | -0.182 |
| <i>Tenericutes</i>      | -0.106    | -0.156 | 0.113   | 0.247  | 0.013     | -0.092     | -0.281    | (-0.494)* | (-0.494)* | 0.265  | 0.208  | -0.14     | 0.096     | -0.082    | -0.313 | 0.162  | -0.131 |
| <i>Verrucomicrobia</i>  | -0.02     | 0.012  | 0.203   | 0.179  | 0.222     | -0.234     | 0.166     | -0.177    | -0.177    | -0.108 | -0.371 | -0.154    | 0.005     | -0.308    | -0.116 | -0.383 | -0.644 |
| WPS_2                   | 0.178     | -0.072 | 0.008   | -0.059 | 0.162     | 0.158      | 0.146     | -0.184    | -0.184    | 0.035  | -0.027 | -0.115    | 0.107     | -0.19     | -0.313 | 0.065  | -0.032 |
| WS2                     | 0.03      | -0.244 | -0.283  | -0.237 | (-0.414)* | 0.056      | -0.362    | 0.149     | 0.149     | 0.21   | -0.196 | 0.048     | -0.068    | -0.152    | -0.005 | 0.152  | -0.015 |
| <i>Zixibacteria</i>     | -0.039    | 0.315  | 0.035   | 0.065  | 0.078     | -0.081     | 0.203     | 0.261     | 0.261     | -0.344 | 0.002  | 0.226     | -0.187    | -0.057    | 0.145  | 0.02   | 0.133  |

Note: SW: soil water content; SMaxW: maximum soil water holding capacity; SminW: minimum soil water holding capacity; BD: soil bulk density; ST: soil temperature; SOC: soil organic carbon; SOM: soil organic matter; TN: total nitrogen; TP: total phosphorus; AP: fast-acting phosphorus; AN: alkaline dissolved nitrogen; AK: fast-acting Potassium; PHO: alkaline phosphatase; INV: sucrase; URE: urease; \* represents P<0.05, \*\* represents P<0.01; \*\*\* represents P<0.001
